# Supplementary material
Source: PubMed Central journal article supplement (PMC3746759)

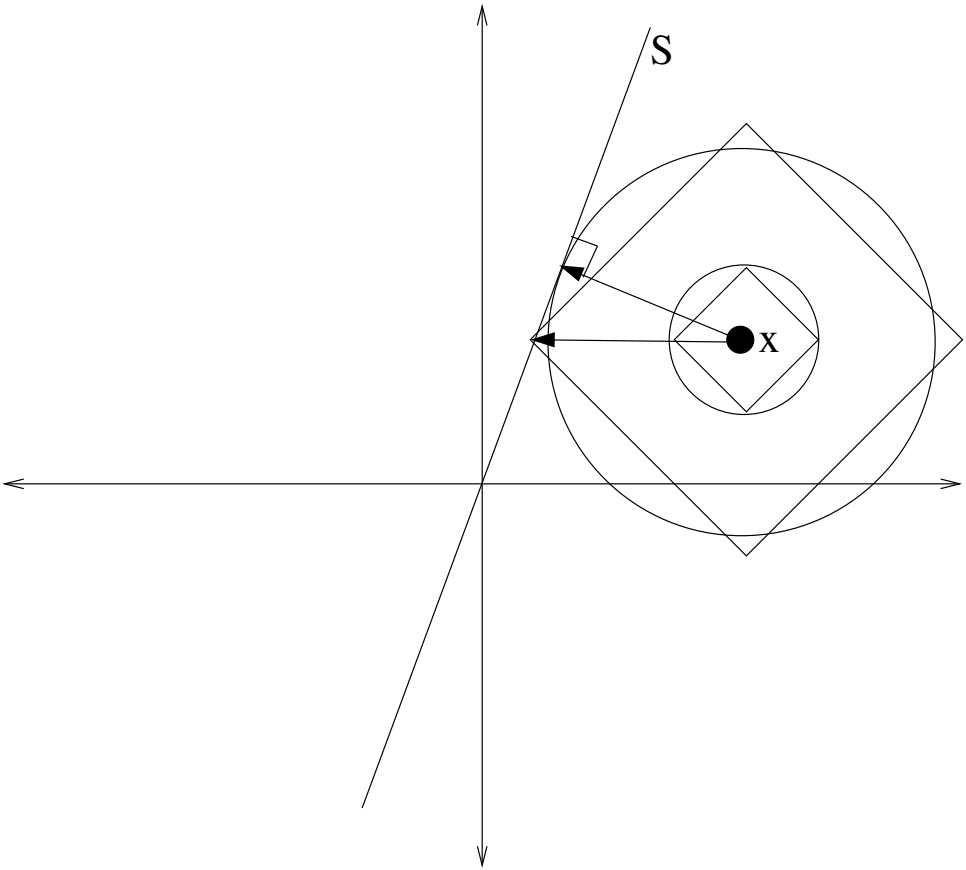

Supplement: NIHMS423342-supplement-02.pdf [file NIHMS423342-supplement-02.pdf]
